# Supplementary material for: Protective Effect of Melatonin against Oxidative Stress-Induced Apoptosis and Enhanced Autophagy in Human Retinal Pigment Epithelium Cells
Source: Oxid Med Cell Longev. 2018 Aug 5;2018:9015765. doi: 10.1155/2018/9015765 (PMC6098907; doi:10.1155/2018/9015765)
Supplement: Supplementary Materials — Supplementary material contains the experimental protocol in revised articles. Figure S1: the experimental protocol for ARPE-19 cells. [file 9015765.f1.docx]

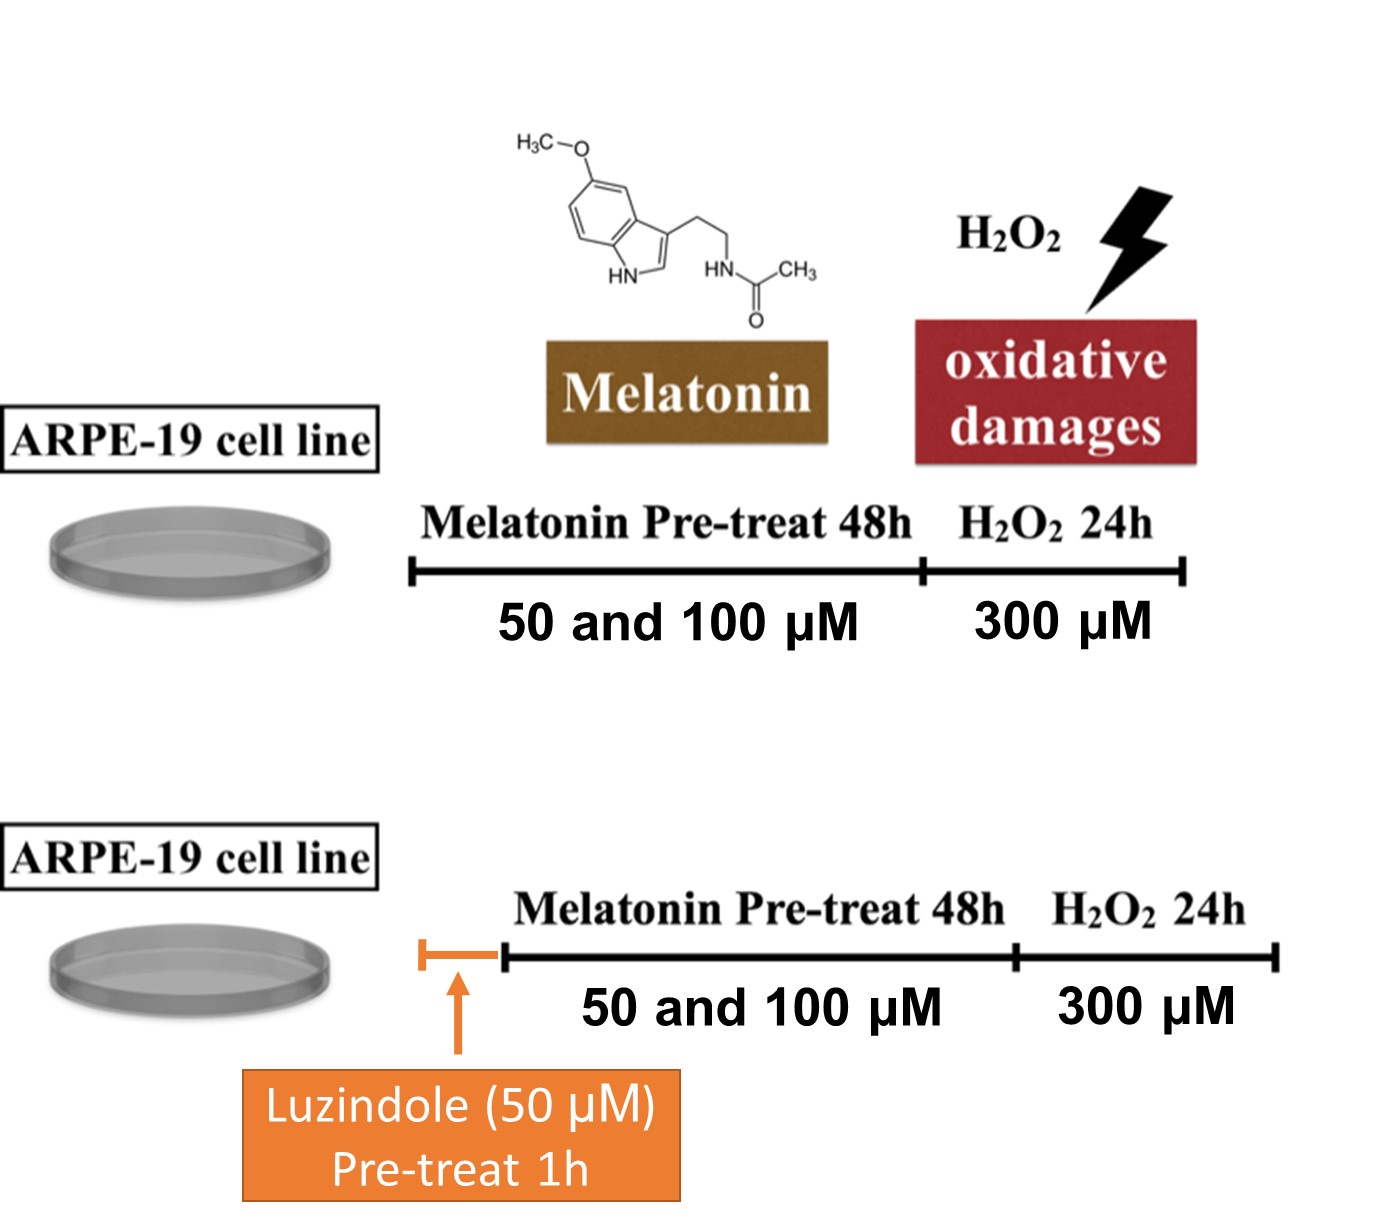


**Figure S1. The experimental protocol for ARPE-19 cell.** The cells were treated with vehicle (ethanol) or melatonin at indicated concentrations for 48 h, and they were then treated with 300 μM H2O2 for 24 h. For the luzindole (melatonin receptor antagonist) test, the RPE cells were seeded as previously detailed. Luzindole was added to the culture medium at a final concentration of 50 μM. One hour later, melatonin was added to the culture medium followed by culturing for 48 h, and H2O2 was then added followed by culturing for 24 h.
